# Supplementary material for: Analysis of modularity and integration suggests evolution of dragonfly wing venation mainly in response to functional demands
Source: J R Soc Interface. 2018 Aug 29;15(145):20180277. doi: 10.1098/rsif.2018.0277 (PMC6127186; doi:10.1098/rsif.2018.0277)
Supplement: Supporting Table S1 [file rsif20180277supp3.xlsx]

## Sheet: Sheet1
Species in the morphological dataset	Species in the molecular dataset (Letsch et al. 2013)	Habitat (codes acc. Letsch et al. 2016)	Colouration type (codes acc. Outomuro et al. 2012)
Aeschnosoma_forcipula	Aeschnosoma_forcipula	0	6
Aeshna_grandis	Aeshna_grandis	1	6
Aeshna_juncea	Aeshna_juncea	1	6
Aeshna_palmata	Aeshna_umbrosa	1	6
Agriogomphus_tumens	Davidius_lunatus	0	6
Anaciaeschna_isoceles	Anaciaeschna_isoceles	1	6
Anaciaeschna_jaspidea	Anaciaeschna_jaspidea	1	6
Anatya_guttata	Anatya_guttata	1	6
Anax_amazili	Anax_imperator	1	6
Andaeschna_andresi	Anaciaeschna_martini	1	6
Antidythemis_nigra	Orthetrum_brachiale	1	1
Aphylla_molossus	Austrogomphus_amphiclitus	0	6
Aphylla_protracta	Antipodogomphus_acolythus	0	6
Archaeogomphus_hamatus	Davidius_moiwanus	1	6
Argyrothemis_argentea	Argyrothemis_argentata	1	6
Arigomphus_cornutus	Gomphus_abbreviatus	0	6
Basiaeschna_janata	Basiaeschna_janata	0	1
Boyeria_vinosa	Boyeria_irene	0	1
Brachymesia_furcata	Brachymesia_gravida	1	1
Brechmorhoga_mendax	Brechmorhoga_mendax	0	6
Brechmorhoga_nubecula	Brachydiplax_chalybea	1	6
Brechmorhoga_praecox_grenadensis	Brachydiplax_denticauda	1	6
Cacoides_latro	Ictinogomphus_pertinax	1	6
Cannaphila_vibex	Brachydiplax_sobrina	1	1
Castoraeschna_januaria	Aeschnophlebia_longistigma	1	6
Celithemis_bertha	Celithemis_elisa	1	1
Cordulegaster_diadema	Cordulegaster_bidentata	0	6
Cordulia_shurtleffi_	Cordulia_shurtleffii	1	1
Coryphaeschna_perrensi	Caliaeschna_microstigma	0	6
Crocothemis_servilia	Crocothemis_servilia	1	1
Cyanogomphus_waltheri	Armagomphus_armiger	0	6
Dasythemis_mincki_mincki	Dythemis_multipunctata	0	6
Desmogomphus_tigrivensis	Gomphus_adelphus	0	6
Diaphlebia_angustipennis	Gomphus_borealis	1	6
Diastatops_obscura	Diastatops_pullata	1	3
Dorocordulia_lepida	Hemicordulia_tau	1	6
Dromogomphus_spinosis	Dromogomphus_spinosus	0	6
Dythemis_fugax	Dythemis_fugax	0	1
Ebegomphus_conchinus	Lanthus_fujiacus	0	6
Edonis_helena	Tetrathemis_corduleformis	1	7
Elasmothemis_cannacrioides	Chalcostephia_flavifrons	1	6
Elga_leptostyla	Deielia_phaon	1	6
Epiaeschna_heros	Aeshna_affinis	1	6
Epigomphus_paludosus	Davidius_bicornutus	0	6
Epitheca_cynosura	Epitheca_costalis	1	1
Epitheca_princeps	Epitheca_princeps	1	8
Erpetogomphus_eutania	Onychogomphus_assimilis	0	6
Erpetogomphus_heterodon	Onychogomphus_costae	0	6
Erythemis_plebeja	Erythemis_simplicicollis	1	1
Erythemis_vesiculosa	Erythemis_vesiculosa	1	1
Erythrodiplax_angustipennis	Erythrodiplax_fusca	1	6
Erythrodiplax_atroterminata	Erythrodiplax_kimminsi	1	5
Erythrodiplax_bromeliicola	Erythrodiplax_minuscula	1	6
Erythrodiplax_bromeliicola2	Erythrodiplax_umbrata	1	6
Erythrodiplax_corallina_	Erythrodiplax_unimaculata	1	7
Fylgia_amazonica	Fylgia_amazonica	1	6
Garrisonia_aurindae	Brachygonia_sp	1	1
Gomphaeschna_antilope	Gomphaeschna_furcillata	1	6
Gomphidia_kirschii	Gomphidia_confluens	1	6
Gomphoides_perdita	Heliogomphus_retroflexus	0	6
Gomphomacromia_chilensis	Gomphomacromia_chilensis	0	1
Gomphomacromia_fallax	Synthemiopsis_gomphomacromioides	0	1
Gomphomacromia_nodisticta	Synthemis_eustalacta	1	6
Gomphomacromia_paradoxa	Gomphomacromia_paradoxa	0	6
Gomphus_australis	Gomphus_descriptus	0	6
Gynacantha_francesca	Gynacantha_bullata	1	6
Gynacantha_laticeps	Gynacantha_japonica	1	6
Gynacantha_nervosa	Gynacantha_ryukyuensis	1	6
Gynacantha_tenuis	Austrogynacantha_heterogena	1	6
Gynothemis_calliste	Brachymesia_herbida	1	1
Gynothemis_pumila	Brachythemis_contaminata	1	6
Gynothemis_uniseta	Brachythemis_leucosticta	1	6
Gynothemis_venipunctata	Bradinopyga_geminata	1	7
Hagenius_brevistylus	Hagenius_brevistylus	0	6
Helocordulia_selysii	Helocordulia_uhleri	0	1
Hypopetalia_pestilens	Hypopetalia_pestilens	0	8
Idiataphe_cubensis	Idiataphe_sp	1	1
Idiogomphoides_demoulini	Hemigomphus_magela	0	8
Lanthus_vernalis	Lanthus_parvulus	0	6
Lauromacromia_dubitalis	Idomacromia_proavita	0	6
Leucorrhinia_frigida	Leucorrhinia_dubia	1	1
Libellula_herculea	Libellula_forensis	1	6
Limnetron_antarcticum	Boyeria_grafiana	0	6
Macrodiplax_balteata	Macrodiplax_balteata	1	1
Macrothemis_calliste	Hydrobasileus_brevistylus	1	6
Macrothemis_griseofrons_	Hydrobasileus_croceus	1	1
Macrothemis_heteronycha_	Leucorrhinia_patricia	1	1
Macrothemis_inacuta	Sympetrum_eroticum	1	6
Melanocacus_interioris2	Ictinogomphus_decoratus	1	1
Melanocacus_mungo	Ictinogomphus_australis	1	6
Miathyria_marcella	Miathyria_marcella	1	1
Miathyria_simplex	Miathyria_simplex	1	1
Micrathyria_aequalis	Micrathyria_aequalis	1	6
Micrathyria_dido	Micrathyria_atra	1	6
Micrathyria_hypodidyma	Micrathyria_didyma	1	6
Micrathyria_ocellata	Micrathyria_ocellata	1	6
Micrathyria_ungulata	Nannophyopsis_clara	1	6
Micrathyria_venezuelae	Notiothemis_robertsi	1	6
Misagria_parana	Misagria_parana	1	6
Mitragomphus_ganzanus	Ictinogomphus_ferox	1	6
Nannothemis_bella	Nannothemis_bella	1	6
Nasiaeschna_pentacantha	Aeshna_canadensis	1	6
Navicordulia_longistyla	Cordulia_amurensis	1	6
Neocordulia_setifera	Hesperocordulia_berthoudi	0	6
Neogomphoides_bidens	Neogomphus_edenticulatus	0	6
Neopetalia_punctata	Neopetalia_punctata	0	8
Nephepeltia_aequisetis	Paltothemis_lineatipes	0	6
Nephepeltia_chalconota	Pseudothemis_zonata	1	6
Nephepeltia_flavifrons	Rhyothemis_severini	1	6
Nephepeltia_flavipennis	Tetrathemis_polleni	1	7
Nephepeltia_leonardina	Sympetrum_ambiguum	1	6
Nephepeltia_p_phryne	Sympetrum_baccha	1	6
Neuraeschna_calverti	Hemianax_ephippiger	1	6
Neurocordulia_molesta	Neurocordulia_obsoleta	1	1
Nothodiplax_dendrophila	Sympetrum_cordulegaster	1	6
Octogomphus_specularis	Octogomphus_specularis	0	6
Oligoclada_abbreviata	Tetrathemis_platyptera	1	6
Oligoclada_laetitia	Rhyothemis_semihyalina	1	6
Oligoclada_rhea	Oligoclada_amphinome	1	6
Oligoclada_rubribasalis	Tyriobapta_sp	1	6
Oligoclada_xanthopleura	Tetrathemis_irregularis	1	6
Ophiogomphus_arizonicus	Ophiogomphus_carolus	0	6
Ophiogomphus_incurvatus	Ophiogomphus_occidentis	0	6
Oplonaeschna_armata	Aeshna_constricta	1	6
Orthemis_discolor	Orthemis_discolor	1	6
Orthemis_philipi	Orthemis_cultriformis	1	5
Orthemis_regalis	Orthemis_ferruginea	1	5
Othemis_attenuata	Orthetrum_albistylum	1	6
Pachydiplax_longipennis	Pachydiplax_longipennis	1	6
Paltothemis_lineatipes	Tholymis_tillarga	1	6
Pantala_flavescens	Pantala_flavescens	1	6
Paracordulia_seriaca	Procordulia_grayi	1	6
Perigomphus_pallidistylus	Hemigomphus_heteroclytus	0	6
Perithemis_lais	Perithemis_intensa	1	9
Perithemis_mooma	Perithemis_lais	1	8
Perithemis_parzefalli	Perithemis_tenera	1	3
Peruviogomphus_moyomambus	Leptogomphus_sauteri	0	6
Phenes_raptor	Phenes_raptor	0	6
Phyllocycla_argentina	Lindenia_tetraphylla	1	6
Phyllocycla_malkini	Microgomphus_chelifer	0	6
Phyllogomphoides_andromeda	Phyllogomphoides_albrighti	0	6
Phyllopetalia_altarensis	Ophiopetalia_diana	0	8
Phyllopetalia_apicalis	Phyllopetalia_apicalis	0	8
Phyllopetalia_apicalis2	Archipetalia_auriculata	0	8
Phyllopetalia_apollo	Phyllopetalia_apollo	0	8
Phyllopetalia_excrescens	Austropetalia_victoria	0	8
Pinheyschna_rileyi	Aeshna_cyanea	1	6
Planiplax_erythropyga	Planiplax_sp	1	6
Praeviogomphus_propius	Gomphus_exilis	1	6
Progomphus_bellei	Progomphus_borealis	0	1
Progomphus_clendoni	Progomphus_obscurus	0	6
Pseudoleon_superbus	Pseudoleon_superbus	0	16
Remartinia_luteipennis	Planaeschna_risi	0	6
Rhionaeschna__dugesi	Rhionaeschna_multicolor	1	6
Rhionaeschna_bonariensis	Aeshna_crenata	1	6
Rhionaeschna_brasiliensis	Aeshna_eremita	1	6
Rhionaeschna_brevifrons	Aeshna_interrupta	1	6
Rhionaeschna_californica	Aeshna_mixta	1	6
Rhionaeschna_demarmelsi	Aeshna_serrata	1	6
Rhionaeschna_draco	Aeshna_subpupillata	0	6
Rhionaeschna_pallipes	Aeshna_tuberculifera	1	6
Rhionaeschna_peralta	Aeshna_verticalis	1	6
Rhionaeschna_planaltica	Polycanthagyna_melanictera	1	6
Rhionaeschna_variegata	Telephlebia_tillyardi	0	6
Rhodopygia_hinei	Rhodopygia_hinei	1	6
Rialla_villosa	Rialla_villosa	1	6
Scapanea_frontalis	Zyxomma_elgneri	1	6
Somatochlora_semicircularis	Somatochlora_alpestris	1	1
Staurophlebia_reticulata_guatemalteca	Brachytron_pratense	1	6
Stylogomphus_sigmastylus	Stylogomphus_albistylus	0	6
Stylurus_potulentus	Stylurus_amnicola	0	6
Sympetrum_villosum	Sympetrum_villosum	1	6
Tachopteryx_thoreyi	Tachopteryx_thoreyi	0	6
Tanypteryx_hageni	Tanypteryx_hageni	0	6
Tauriphila_argo	Tramea_propinqua	1	1
Tauriphila_australis	Tramea_transmarina	1	1
Tauriphila_risi	Tramea_virginia	1	1
Tholymus_citrina	Tholymis_citrina	1	8
Tibiagomphus_uncatus	Gomphus_externus	0	6
Tramea_abdominalis	Tramea_basilaris	1	1
Tramea_calverti	Tramea_lacerata	1	1
Tramea_cophysa	Tramea_loewii	1	1
Triacanthagyna_caribbea	Oligoaeschna_pryeri	1	6
Uracis_imbuta	Ucaris_imbuta	1	5
Ypirangathemis_calverti	Uracis_fastigiata	1	6
Zenithoptera_fasciata	Zenithoptera_fasciata	1	3
Zenithoptera_lanei	Trithetrum_navasi	0	3
Zenithoptera_viola	Zyxomma_petiolatum	1	3
Zonophora_calippus	Sieboldius_albardae	0	6
